# Supplementary material for: Why Even More Clinical Research Studies May Be False: Effect of Asymmetrical Handling of Clinically Unexpected Values
Source: PLoS One. 2013 Jun 25;8(6):e65323. doi: 10.1371/journal.pone.0065323 (PMC3692492; doi:10.1371/journal.pone.0065323)
Supplement: File S1 — An Excel Spreadsheet compatible with both Microsoft Excel and Libreoffice Calc for generating dot-plots for up to 6 groups with 300 points per group. (XLS) [file pone.0065323.s001.xls]

## Sheet: Instructions
	A spreadsheet for generating dot plots, supplementary material to “Why even more clinical research studies may be false: effect of asymmetrical handling of clinically unexpected values”
	Introduction
	This spreadsheet accompanies our publication “Why even more clinical research studies may be false: effect of asymmetrical handling of clinically unexpected values”. In this paper we demonstrate the susceptibility of observational studies to bias though the natural clinical activities of removal, reclassification, and remeasurement of clinically surprising values.
	We demonstrate how this manipulation can be apparent if rather than presenting summary data, dot plots are used. Unlike summary bar charts (“dynamite plots”), they allow the reader to visualize the whole data set and assure themselves that group differences do not appear excessively dependent on different tail shapes between groups.
	Microsoft Excel and the free and open-source office suite Libreoffice do not contain built in functions to generate these plots. More complex statistical software such as “R”, a free and open-source statistical environment are able to, but are not yet part of the standard tool-kit of clinical researchers.
	We have therefore developed this spreadsheet which can be opened by both Microsoft Excel and Libreoffice to allow researchers to easily generate dot plots (note that Wilkinson 1999 terms the plots generated by this spreadsheet as histodots, for true dot plots use statistical software such as "R").
	The most recent version of these spreadsheets will be available at http://matthew.shun-shin.com/ekt.html
	Instructions for use
	1) Switch to the sheet labeled “Data” below.
	2) Into the blue boxes delete the sample data by highlighting them and selecting Edit-->Clear-->Contents (in Excel) or Edit-->Delete Content (in Libreoffice).
	3) Enter or copy and paste in your own data – up to four groups with up to 300 datapoints per group are supported.
	4) The dotplot on the right will automatically update once you have pasted in the data. If you have fewer data points you might want to adjust the "number of bins" to obtain an aesthetically pleasing plot.
	5) Edit the graph title before copying and pasting it into your own document.
	Licensed under the GPL
	This program is free software: you can redistribute it and/or modify it under the terms of the GNU General Public License as published by the Free Software Foundation, either version 3 of the License, or (at your option) any later version.
	This spreadsheet is distributed in the hope that it will be useful, but WITHOUT ANY WARRANTY; without even the implied warranty of MERCHANTABILITY or FITNESS FOR A PARTICULAR PURPOSE. See the GNU General Public License for more details.
	You should have received a copy of the GNU General Public License along with this program. If not, see <http://www.gnu.org/licenses/>.
	Copyright Matthew Shun-Shin, Darrel P Francis 2013										Version 1

## Sheet: Data
This sheet allows you to easily create dot plots for up to 6 groups with 300 data-points per group. If you have less than 6 groups simply leave the remaining columns blank. Please delete the illustrative data and copy and paste in your own. The only parameter you need to tweak is the “Number of bins” value in the cell below. After entering the data you can double click on the graph and add titles…
			Group 1	Group 2	Group 3	Group 4	Group 5	Group 6		Number of bins
										50
	Values	1	0.883083	0.457794	0	0	0	0
		2	1.37871	1.64632
		3	1.34232	1.3117
		4	-0.756542	0.175847
		5	-0.299067	-0.700302
		6	1.00291	0.874068
		7	0.568093	-0.79098
		8	-0.311161	0.552517
		9	0.722076	0.330529
		10	-0.594446	-0.817379
		11	-0.872895	-1.08962
		12	-0.366133	-0.440136
		13	0.508633	-0.183225
		14	-0.126687	1.43758
		15	0.680539	0.115378
		16	0.27778	-0.223263
		17	-0.287983	-0.852946
		18	-0.620241	1.09281
		19	0.227813	0.181231
		20	-0.44328	-0.648069
		21	-1.67452	0.302741
		22	0.668927	-0.928398
		23	-0.0791361	-0.440871
		24	-0.543925	-0.372482
		25	0.00967644	-0.817698
		26	-0.464139	-0.577042
		27	1.1263	1.01409
		28	-0.471038	0.0661055
		29	0.437422	-1.93007
		30	0.422757	-0.720112
		31	-0.0111968	0.349959
		32	1.31791	0.439655
		33	-0.982758	-1.49767
		34	1.21326	0.0459948
		35	-0.12864	-0.664003
		36	0.415322	-0.351878
		37	-1.93184	-0.861052
		38	-1.85817	0.647905
		39	1.66136	-0.709226
		40	0.278338	-0.399671
		41	0.501944	0.146621
		42	0.635408	2.1301
		43	0.312967	-0.0877145
		44	-1.42108	-1.46689
		45	-0.265712	0.651661
		46	0.323512	0.879557
		47	1.38353	0.959206
		48	-1.40562	-0.756954
		49	-2.45087	-0.616447
		50	-1.20578	-0.828731
		51	-1.33535	-1.40258
		52	1.04797	0.42611
		53	-0.599548	0.224879
		54	-1.61081	-0.67457
		55	0.19425	1.31422
		56	0.475929	-0.329389
		57	-0.0277103	-0.993744
		58	0.9933	-1.27101
		59	0.840091	-1.12162
		60	-0.704942	0.309421
		61	0.203298	-1.19559
		62	-0.891523	1.45055
		63	1.61044	0.386777
		64	-0.686792	1.0175
		65	0.915685	1.1839
		66	-0.146159	-1.16856
		67	-0.76636	-0.497768
		68	-0.0383152	-0.367639
		69	0.551038	-0.249
		70	-0.215418	0.636355
		71	0.207447	0.997066
		72	-0.241631	0.555793
		73	0.540246	0.12831
		74	2.28471	-0.0425819
		75	0.770509	-1.19389
		76	-0.21852
		77	-0.552014
		78	1.28837
		79	0.598373
		80	0.316859
		81	-0.557544
		82	1.86252
		83	0.340284
		84	-0.534177
		85	-1.07576
		86	1.01556
		87	0.552586
		88	1.81455
		89	1.12866
		90	-1.41226
		91	0.77628
		92	-0.904194
		93	0.151694
		94	-0.475202
		95	-0.086817
		96	0.282715
		97	0.874979
		98	0.485137
		99	-0.340962
		100	-0.589804
		101
		102
		103
		104
		105
		106
		107
		108
		109
		110
		111
		112
		113
		114
		115
		116
		117
		118
		119
		120
		121
		122
		123
		124
		125
		126
		127
		128
		129
		130
		131
		132
		133
		134
		135
		136
		137
		138
		139
		140
		141
		142
		143
		144
		145
		146
		147
		148
		149
		150
		151
		152
		153
		154
		155
		156
		157
		158
		159
		160
		161
		162
		163
		164
		165
		166
		167
		168
		169
		170
		171
		172
		173
		174
		175
		176
		177
		178
		179
		180
		181
		182
		183
		184
		185
		186
		187
		188
		189
		190
		191
		192
		193
		194
		195
		196
		197
		198
		199
		200
		201
		202
		203
		204
		205
		206
		207
		208
		209
		210
		211
		212
		213
		214
		215
		216
		217
		218
		219
		220
		221
		222
		223
		224
		225
		226
		227
		228
		229
		230
		231
		232
		233
		234
		235
		236
		237
		238
		239
		240
		241
		242
		243
		244
		245
		246
		247
		248
		249
		250
		251
		252
		253
		254
		255
		256
		257
		258
		259
		260
		261
		262
		263
		264
		265
		266
		267
		268
		269
		270
		271
		272
		273
		274
		275
		276
		277
		278
		279
		280
		281
		282
		283
		284
		285
		286
		287
		288
		289
		290
		291
		292
		293
		294
		295
		296
		297
		298
		299
		300

## Sheet: DP_Calc
This sheet performs the calculations for generating the dot plots. If you are just using this workbook to generate dotplots then you should not need to make any changes to this sheet.
			Raw Y							Binned Y							Binned X							Binned X + Displacement							Number of Bins
			Group 1	Group 2	Group 3	Group 4	Group 5	Group 6		Group 1	Group 2	Group 3	Group 4	Group 5	Group 6		Group 1	Group 2	Group 3	Group 4	Group 5	Group 6		Group 1	Group 2	Group 3	Group 4	Group 5	Group 6		50
	Values	1	0.883083	0.457794	0	0	0	0		0.852405	0.473558	0	0	0	0		-0.1	-0.05	0	0	0	0		0.848485	1.92424	3	4	5	6
		2	1.37871	1.64632						1.42067	1.6101						-0.05	0						0.924242	2	#N/A	#N/A	#N/A	#N/A		Bin Step
		3	1.34232	1.3117						1.32596	1.32596						-0.1	-0.05						0.848485	1.92424	#N/A	#N/A	#N/A	#N/A		0.0947117
		4	-0.756542	0.175847						-0.757693	0.189423						-0.05	-0.15						0.924242	1.77273	#N/A	#N/A	#N/A	#N/A
		5	-0.299067	-0.700302						-0.284135	-0.662982						-0.2	-0.25						0.69697	1.62121	#N/A	#N/A	#N/A	#N/A		Max X Displacement
		6	1.00291	0.874068						1.04183	0.852405						-0.1	-0.05						0.848485	1.92424	#N/A	#N/A	#N/A	#N/A		0.3
		7	0.568093	-0.79098						0.56827	-0.757693						-0.2	-0.1						0.69697	1.84848	#N/A	#N/A	#N/A	#N/A
		8	-0.311161	0.552517						-0.284135	0.56827						-0.1	-0.05						0.848485	1.92424	#N/A	#N/A	#N/A	#N/A
		9	0.722076	0.330529						0.757693	0.284135						-0.1	-0.1						0.848485	1.84848	#N/A	#N/A	#N/A	#N/A
		10	-0.594446	-0.817379						-0.56827	-0.852405						-0.3	-0.2						0.545455	1.69697	#N/A	#N/A	#N/A	#N/A
		11	-0.872895	-1.08962						-0.852405	-1.13654						-0.05	-0.1						0.924242	1.84848	#N/A	#N/A	#N/A	#N/A
		12	-0.366133	-0.440136						-0.378847	-0.473558						-0.05	-0.1						0.924242	1.84848	#N/A	#N/A	#N/A	#N/A
		13	0.508633	-0.183225						0.473558	-0.189423						-0.2	-0.05						0.69697	1.92424	#N/A	#N/A	#N/A	#N/A
		14	-0.126687	1.43758						-0.0947117	1.42067						-0.15	-0.05						0.772727	1.92424	#N/A	#N/A	#N/A	#N/A
		15	0.680539	0.115378						0.662982	0.0947117						-0.1	-0.1						0.848485	1.84848	#N/A	#N/A	#N/A	#N/A
		16	0.27778	-0.223263						0.284135	-0.189423						-0.25	0.05						0.621212	2.07576	#N/A	#N/A	#N/A	#N/A
		17	-0.287983	-0.852946						-0.284135	-0.852405						0	-0.1						1	1.84848	#N/A	#N/A	#N/A	#N/A
		18	-0.620241	1.09281						-0.662982	1.13654						-0.1	0						0.848485	2	#N/A	#N/A	#N/A	#N/A
		19	0.227813	0.181231						0.189423	0.189423						-0.2	-0.05						0.69697	1.92424	#N/A	#N/A	#N/A	#N/A
		20	-0.44328	-0.648069						-0.473558	-0.662982						-0.15	-0.15						0.772727	1.77273	#N/A	#N/A	#N/A	#N/A
		21	-1.67452	0.302741						-1.70481	0.284135						0	0						1	2	#N/A	#N/A	#N/A	#N/A
		22	0.668927	-0.928398						0.662982	-0.947117						0	-0.05						1	1.92424	#N/A	#N/A	#N/A	#N/A
		23	-0.0791361	-0.440871						-0.0947117	-0.473558						-0.05	0						0.924242	2	#N/A	#N/A	#N/A	#N/A
		24	-0.543925	-0.372482						-0.56827	-0.378847						-0.2	-0.15						0.69697	1.77273	#N/A	#N/A	#N/A	#N/A
		25	0.00967644	-0.817698						0	-0.852405						-0.15	0						0.772727	2	#N/A	#N/A	#N/A	#N/A
		26	-0.464139	-0.577042						-0.473558	-0.56827						-0.05	0						0.924242	2	#N/A	#N/A	#N/A	#N/A
		27	1.1263	1.01409						1.13654	1.04183						-0.05	-0.1						0.924242	1.84848	#N/A	#N/A	#N/A	#N/A
		28	-0.471038	0.0661055						-0.473558	0.0947117						0.05	0						1.07576	2	#N/A	#N/A	#N/A	#N/A
		29	0.437422	-1.93007						0.473558	-1.89423						-0.1	0						0.848485	2	#N/A	#N/A	#N/A	#N/A
		30	0.422757	-0.720112						0.378847	-0.757693						-0.1	0						0.848485	2	#N/A	#N/A	#N/A	#N/A
		31	-0.0111968	0.349959						0	0.378847						-0.05	-0.1						0.924242	1.84848	#N/A	#N/A	#N/A	#N/A
		32	1.31791	0.439655						1.32596	0.473558						0	0.05						1	2.07576	#N/A	#N/A	#N/A	#N/A
		33	-0.982758	-1.49767						-0.947117	-1.51539						-0.05	0						0.924242	2	#N/A	#N/A	#N/A	#N/A
		34	1.21326	0.0459948						1.23125	0						0	-0.05						1	1.92424	#N/A	#N/A	#N/A	#N/A
		35	-0.12864	-0.664003						-0.0947117	-0.662982						0.05	-0.05						1.07576	1.92424	#N/A	#N/A	#N/A	#N/A
		36	0.415322	-0.351878						0.378847	-0.378847						0	-0.05						1	1.92424	#N/A	#N/A	#N/A	#N/A
		37	-1.93184	-0.861052						-1.89423	-0.852405						-0.05	0.1						0.924242	2.15152	#N/A	#N/A	#N/A	#N/A
		38	-1.85817	0.647905						-1.89423	0.662982						0.05	-0.1						1.07576	1.84848	#N/A	#N/A	#N/A	#N/A
		39	1.66136	-0.709226						1.70481	-0.662982						0	0.05						1	2.07576	#N/A	#N/A	#N/A	#N/A
		40	0.278338	-0.399671						0.284135	-0.378847						-0.15	0.05						0.772727	2.07576	#N/A	#N/A	#N/A	#N/A
		41	0.501944	0.146621						0.473558	0.189423						0	0.05						1	2.07576	#N/A	#N/A	#N/A	#N/A
		42	0.635408	2.1301						0.662982	2.08366						0.1	0						1.15152	2	#N/A	#N/A	#N/A	#N/A
		43	0.312967	-0.0877145						0.284135	-0.0947117						-0.05	0						0.924242	2	#N/A	#N/A	#N/A	#N/A
		44	-1.42108	-1.46689						-1.42067	-1.42067						-0.1	-0.05						0.848485	1.92424	#N/A	#N/A	#N/A	#N/A
		45	-0.265712	0.651661						-0.284135	0.662982						0.1	0						1.15152	2	#N/A	#N/A	#N/A	#N/A
		46	0.323512	0.879557						0.284135	0.852405						0.05	0.05						1.07576	2.07576	#N/A	#N/A	#N/A	#N/A
		47	1.38353	0.959206						1.42067	0.947117						0.05	0						1.07576	2	#N/A	#N/A	#N/A	#N/A
		48	-1.40562	-0.756954						-1.42067	-0.757693						0	0.1						1	2.15152	#N/A	#N/A	#N/A	#N/A
		49	-2.45087	-0.616447						-2.4625	-0.662982						0	0.15						1	2.22727	#N/A	#N/A	#N/A	#N/A
		50	-1.20578	-0.828731						-1.23125	-0.852405						0	0.2						1	2.30303	#N/A	#N/A	#N/A	#N/A
		51	-1.33535	-1.40258						-1.32596	-1.42067						0	0.05						1	2.07576	#N/A	#N/A	#N/A	#N/A
		52	1.04797	0.42611						1.04183	0.378847						0	0						1	2	#N/A	#N/A	#N/A	#N/A
		53	-0.599548	0.224879						-0.56827	0.189423						-0.1	0.15						0.848485	2.22727	#N/A	#N/A	#N/A	#N/A
		54	-1.61081	-0.67457						-1.6101	-0.662982						0	0.25						1	2.37879	#N/A	#N/A	#N/A	#N/A
		55	0.19425	1.31422						0.189423	1.32596						-0.1	0.05						0.848485	2.07576	#N/A	#N/A	#N/A	#N/A
		56	0.475929	-0.329389						0.473558	-0.284135						0.1	-0.05						1.15152	1.92424	#N/A	#N/A	#N/A	#N/A
		57	-0.0277103	-0.993744						0	-0.947117						0.05	0.05						1.07576	2.07576	#N/A	#N/A	#N/A	#N/A
		58	0.9933	-1.27101						0.947117	-1.23125						-0.05	-0.1						0.924242	1.84848	#N/A	#N/A	#N/A	#N/A
		59	0.840091	-1.12162						0.852405	-1.13654						0	0						1	2	#N/A	#N/A	#N/A	#N/A
		60	-0.704942	0.309421						-0.662982	0.284135						0	0.1						1	2.15152	#N/A	#N/A	#N/A	#N/A
		61	0.203298	-1.19559						0.189423	-1.23125						0	0						1	2	#N/A	#N/A	#N/A	#N/A
		62	-0.891523	1.45055						-0.852405	1.42067						0.05	0.05						1.07576	2.07576	#N/A	#N/A	#N/A	#N/A
		63	1.61044	0.386777						1.6101	0.378847						0	0.1						1	2.15152	#N/A	#N/A	#N/A	#N/A
		64	-0.686792	1.0175						-0.662982	1.04183						0.1	0						1.15152	2	#N/A	#N/A	#N/A	#N/A
		65	0.915685	1.1839						0.947117	1.23125						0.05	0						1.07576	2	#N/A	#N/A	#N/A	#N/A
		66	-0.146159	-1.16856						-0.189423	-1.13654						-0.1	0.1						0.848485	2.15152	#N/A	#N/A	#N/A	#N/A
		67	-0.76636	-0.497768						-0.757693	-0.473558						0.05	0.1						1.07576	2.15152	#N/A	#N/A	#N/A	#N/A
		68	-0.0383152	-0.367639						0	-0.378847						0.15	0.15						1.22727	2.22727	#N/A	#N/A	#N/A	#N/A
		69	0.551038	-0.249						0.56827	-0.284135						-0.1	0.05						0.848485	2.07576	#N/A	#N/A	#N/A	#N/A
		70	-0.215418	0.636355						-0.189423	0.662982						0	0.1						1	2.15152	#N/A	#N/A	#N/A	#N/A
		71	0.207447	0.997066						0.189423	1.04183						0.1	0.1						1.15152	2.15152	#N/A	#N/A	#N/A	#N/A
		72	-0.241631	0.555793						-0.284135	0.56827						0.2	0.05						1.30303	2.07576	#N/A	#N/A	#N/A	#N/A
		73	0.540246	0.12831						0.56827	0.0947117						0	0.1						1	2.15152	#N/A	#N/A	#N/A	#N/A
		74	2.28471	-0.0425819						2.27308	0						0	0.05						1	2.07576	#N/A	#N/A	#N/A	#N/A
		75	0.770509	-1.19389						0.757693	-1.23125						0	0.1						1	2.15152	#N/A	#N/A	#N/A	#N/A
		76	-0.21852							-0.189423							0.1							1.15152	#N/A	#N/A	#N/A	#N/A	#N/A
		77	-0.552014							-0.56827							0							1	#N/A	#N/A	#N/A	#N/A	#N/A
		78	1.28837							1.32596							0.1							1.15152	#N/A	#N/A	#N/A	#N/A	#N/A
		79	0.598373							0.56827							0.1							1.15152	#N/A	#N/A	#N/A	#N/A	#N/A
		80	0.316859							0.284135							0.15							1.22727	#N/A	#N/A	#N/A	#N/A	#N/A
		81	-0.557544							-0.56827							0.1							1.15152	#N/A	#N/A	#N/A	#N/A	#N/A
		82	1.86252							1.89423							0							1	#N/A	#N/A	#N/A	#N/A	#N/A
		83	0.340284							0.378847							0.1							1.15152	#N/A	#N/A	#N/A	#N/A	#N/A
		84	-0.534177							-0.56827							0.2							1.30303	#N/A	#N/A	#N/A	#N/A	#N/A
		85	-1.07576							-1.04183							0							1	#N/A	#N/A	#N/A	#N/A	#N/A
		86	1.01556							1.04183							0.1							1.15152	#N/A	#N/A	#N/A	#N/A	#N/A
		87	0.552586							0.56827							0.2							1.30303	#N/A	#N/A	#N/A	#N/A	#N/A
		88	1.81455							1.79952							0							1	#N/A	#N/A	#N/A	#N/A	#N/A
		89	1.12866							1.13654							0.05							1.07576	#N/A	#N/A	#N/A	#N/A	#N/A
		90	-1.41226							-1.42067							0.1							1.15152	#N/A	#N/A	#N/A	#N/A	#N/A
		91	0.77628							0.757693							0.1							1.15152	#N/A	#N/A	#N/A	#N/A	#N/A
		92	-0.904194							-0.947117							0.05							1.07576	#N/A	#N/A	#N/A	#N/A	#N/A
		93	0.151694							0.189423							0.2							1.30303	#N/A	#N/A	#N/A	#N/A	#N/A
		94	-0.475202							-0.473558							0.15							1.22727	#N/A	#N/A	#N/A	#N/A	#N/A
		95	-0.086817							-0.0947117							0.15							1.22727	#N/A	#N/A	#N/A	#N/A	#N/A
		96	0.282715							0.284135							0.25							1.37879	#N/A	#N/A	#N/A	#N/A	#N/A
		97	0.874979							0.852405							0.1							1.15152	#N/A	#N/A	#N/A	#N/A	#N/A
		98	0.485137							0.473558							0.2							1.30303	#N/A	#N/A	#N/A	#N/A	#N/A
		99	-0.340962							-0.378847							0.05							1.07576	#N/A	#N/A	#N/A	#N/A	#N/A
		100	-0.589804							-0.56827							0.3							1.45455	#N/A	#N/A	#N/A	#N/A	#N/A
		101																						#N/A	#N/A	#N/A	#N/A	#N/A	#N/A
		102																						#N/A	#N/A	#N/A	#N/A	#N/A	#N/A
		103																						#N/A	#N/A	#N/A	#N/A	#N/A	#N/A
		104																						#N/A	#N/A	#N/A	#N/A	#N/A	#N/A
		105																						#N/A	#N/A	#N/A	#N/A	#N/A	#N/A
		106																						#N/A	#N/A	#N/A	#N/A	#N/A	#N/A
		107																						#N/A	#N/A	#N/A	#N/A	#N/A	#N/A
		108																						#N/A	#N/A	#N/A	#N/A	#N/A	#N/A
		109																						#N/A	#N/A	#N/A	#N/A	#N/A	#N/A
		110																						#N/A	#N/A	#N/A	#N/A	#N/A	#N/A
		111																						#N/A	#N/A	#N/A	#N/A	#N/A	#N/A
		112																						#N/A	#N/A	#N/A	#N/A	#N/A	#N/A
		113																						#N/A	#N/A	#N/A	#N/A	#N/A	#N/A
		114																						#N/A	#N/A	#N/A	#N/A	#N/A	#N/A
		115																						#N/A	#N/A	#N/A	#N/A	#N/A	#N/A
		116																						#N/A	#N/A	#N/A	#N/A	#N/A	#N/A
		117																						#N/A	#N/A	#N/A	#N/A	#N/A	#N/A
		118																						#N/A	#N/A	#N/A	#N/A	#N/A	#N/A
		119																						#N/A	#N/A	#N/A	#N/A	#N/A	#N/A
		120																						#N/A	#N/A	#N/A	#N/A	#N/A	#N/A
		121																						#N/A	#N/A	#N/A	#N/A	#N/A	#N/A
		122																						#N/A	#N/A	#N/A	#N/A	#N/A	#N/A
		123																						#N/A	#N/A	#N/A	#N/A	#N/A	#N/A
		124																						#N/A	#N/A	#N/A	#N/A	#N/A	#N/A
		125																						#N/A	#N/A	#N/A	#N/A	#N/A	#N/A
		126																						#N/A	#N/A	#N/A	#N/A	#N/A	#N/A
		127																						#N/A	#N/A	#N/A	#N/A	#N/A	#N/A
		128																						#N/A	#N/A	#N/A	#N/A	#N/A	#N/A
		129																						#N/A	#N/A	#N/A	#N/A	#N/A	#N/A
		130																						#N/A	#N/A	#N/A	#N/A	#N/A	#N/A
		131																						#N/A	#N/A	#N/A	#N/A	#N/A	#N/A
		132																						#N/A	#N/A	#N/A	#N/A	#N/A	#N/A
		133																						#N/A	#N/A	#N/A	#N/A	#N/A	#N/A
		134																						#N/A	#N/A	#N/A	#N/A	#N/A	#N/A
		135																						#N/A	#N/A	#N/A	#N/A	#N/A	#N/A
		136																						#N/A	#N/A	#N/A	#N/A	#N/A	#N/A
		137																						#N/A	#N/A	#N/A	#N/A	#N/A	#N/A
		138																						#N/A	#N/A	#N/A	#N/A	#N/A	#N/A
		139																						#N/A	#N/A	#N/A	#N/A	#N/A	#N/A
		140																						#N/A	#N/A	#N/A	#N/A	#N/A	#N/A
		141																						#N/A	#N/A	#N/A	#N/A	#N/A	#N/A
		142																						#N/A	#N/A	#N/A	#N/A	#N/A	#N/A
		143																						#N/A	#N/A	#N/A	#N/A	#N/A	#N/A
		144																						#N/A	#N/A	#N/A	#N/A	#N/A	#N/A
		145																						#N/A	#N/A	#N/A	#N/A	#N/A	#N/A
		146																						#N/A	#N/A	#N/A	#N/A	#N/A	#N/A
		147																						#N/A	#N/A	#N/A	#N/A	#N/A	#N/A
		148																						#N/A	#N/A	#N/A	#N/A	#N/A	#N/A
		149																						#N/A	#N/A	#N/A	#N/A	#N/A	#N/A
		150																						#N/A	#N/A	#N/A	#N/A	#N/A	#N/A
		151																						#N/A	#N/A	#N/A	#N/A	#N/A	#N/A
		152																						#N/A	#N/A	#N/A	#N/A	#N/A	#N/A
		153																						#N/A	#N/A	#N/A	#N/A	#N/A	#N/A
		154																						#N/A	#N/A	#N/A	#N/A	#N/A	#N/A
		155																						#N/A	#N/A	#N/A	#N/A	#N/A	#N/A
		156																						#N/A	#N/A	#N/A	#N/A	#N/A	#N/A
		157																						#N/A	#N/A	#N/A	#N/A	#N/A	#N/A
		158																						#N/A	#N/A	#N/A	#N/A	#N/A	#N/A
		159																						#N/A	#N/A	#N/A	#N/A	#N/A	#N/A
		160																						#N/A	#N/A	#N/A	#N/A	#N/A	#N/A
		161																						#N/A	#N/A	#N/A	#N/A	#N/A	#N/A
		162																						#N/A	#N/A	#N/A	#N/A	#N/A	#N/A
		163																						#N/A	#N/A	#N/A	#N/A	#N/A	#N/A
		164																						#N/A	#N/A	#N/A	#N/A	#N/A	#N/A
		165																						#N/A	#N/A	#N/A	#N/A	#N/A	#N/A
		166																						#N/A	#N/A	#N/A	#N/A	#N/A	#N/A
		167																						#N/A	#N/A	#N/A	#N/A	#N/A	#N/A
		168																						#N/A	#N/A	#N/A	#N/A	#N/A	#N/A
		169																						#N/A	#N/A	#N/A	#N/A	#N/A	#N/A
		170																						#N/A	#N/A	#N/A	#N/A	#N/A	#N/A
		171																						#N/A	#N/A	#N/A	#N/A	#N/A	#N/A
		172																						#N/A	#N/A	#N/A	#N/A	#N/A	#N/A
		173																						#N/A	#N/A	#N/A	#N/A	#N/A	#N/A
		174																						#N/A	#N/A	#N/A	#N/A	#N/A	#N/A
		175																						#N/A	#N/A	#N/A	#N/A	#N/A	#N/A
		176																						#N/A	#N/A	#N/A	#N/A	#N/A	#N/A
		177																						#N/A	#N/A	#N/A	#N/A	#N/A	#N/A
		178																						#N/A	#N/A	#N/A	#N/A	#N/A	#N/A
		179																						#N/A	#N/A	#N/A	#N/A	#N/A	#N/A
		180																						#N/A	#N/A	#N/A	#N/A	#N/A	#N/A
		181																						#N/A	#N/A	#N/A	#N/A	#N/A	#N/A
		182																						#N/A	#N/A	#N/A	#N/A	#N/A	#N/A
		183																						#N/A	#N/A	#N/A	#N/A	#N/A	#N/A
		184																						#N/A	#N/A	#N/A	#N/A	#N/A	#N/A
		185																						#N/A	#N/A	#N/A	#N/A	#N/A	#N/A
		186																						#N/A	#N/A	#N/A	#N/A	#N/A	#N/A
		187																						#N/A	#N/A	#N/A	#N/A	#N/A	#N/A
		188																						#N/A	#N/A	#N/A	#N/A	#N/A	#N/A
		189																						#N/A	#N/A	#N/A	#N/A	#N/A	#N/A
		190																						#N/A	#N/A	#N/A	#N/A	#N/A	#N/A
		191																						#N/A	#N/A	#N/A	#N/A	#N/A	#N/A
		192																						#N/A	#N/A	#N/A	#N/A	#N/A	#N/A
		193																						#N/A	#N/A	#N/A	#N/A	#N/A	#N/A
		194																						#N/A	#N/A	#N/A	#N/A	#N/A	#N/A
		195																						#N/A	#N/A	#N/A	#N/A	#N/A	#N/A
		196																						#N/A	#N/A	#N/A	#N/A	#N/A	#N/A
		197																						#N/A	#N/A	#N/A	#N/A	#N/A	#N/A
		198																						#N/A	#N/A	#N/A	#N/A	#N/A	#N/A
		199																						#N/A	#N/A	#N/A	#N/A	#N/A	#N/A
		200																						#N/A	#N/A	#N/A	#N/A	#N/A	#N/A
		201																						#N/A	#N/A	#N/A	#N/A	#N/A	#N/A
		202																						#N/A	#N/A	#N/A	#N/A	#N/A	#N/A
		203																						#N/A	#N/A	#N/A	#N/A	#N/A	#N/A
		204																						#N/A	#N/A	#N/A	#N/A	#N/A	#N/A
		205																						#N/A	#N/A	#N/A	#N/A	#N/A	#N/A
		206																						#N/A	#N/A	#N/A	#N/A	#N/A	#N/A
		207																						#N/A	#N/A	#N/A	#N/A	#N/A	#N/A
		208																						#N/A	#N/A	#N/A	#N/A	#N/A	#N/A
		209																						#N/A	#N/A	#N/A	#N/A	#N/A	#N/A
		210																						#N/A	#N/A	#N/A	#N/A	#N/A	#N/A
		211																						#N/A	#N/A	#N/A	#N/A	#N/A	#N/A
		212																						#N/A	#N/A	#N/A	#N/A	#N/A	#N/A
		213																						#N/A	#N/A	#N/A	#N/A	#N/A	#N/A
		214																						#N/A	#N/A	#N/A	#N/A	#N/A	#N/A
		215																						#N/A	#N/A	#N/A	#N/A	#N/A	#N/A
		216																						#N/A	#N/A	#N/A	#N/A	#N/A	#N/A
		217																						#N/A	#N/A	#N/A	#N/A	#N/A	#N/A
		218																						#N/A	#N/A	#N/A	#N/A	#N/A	#N/A
		219																						#N/A	#N/A	#N/A	#N/A	#N/A	#N/A
		220																						#N/A	#N/A	#N/A	#N/A	#N/A	#N/A
		221																						#N/A	#N/A	#N/A	#N/A	#N/A	#N/A
		222																						#N/A	#N/A	#N/A	#N/A	#N/A	#N/A
		223																						#N/A	#N/A	#N/A	#N/A	#N/A	#N/A
		224																						#N/A	#N/A	#N/A	#N/A	#N/A	#N/A
		225																						#N/A	#N/A	#N/A	#N/A	#N/A	#N/A
		226																						#N/A	#N/A	#N/A	#N/A	#N/A	#N/A
		227																						#N/A	#N/A	#N/A	#N/A	#N/A	#N/A
		228																						#N/A	#N/A	#N/A	#N/A	#N/A	#N/A
		229																						#N/A	#N/A	#N/A	#N/A	#N/A	#N/A
		230																						#N/A	#N/A	#N/A	#N/A	#N/A	#N/A
		231																						#N/A	#N/A	#N/A	#N/A	#N/A	#N/A
		232																						#N/A	#N/A	#N/A	#N/A	#N/A	#N/A
		233																						#N/A	#N/A	#N/A	#N/A	#N/A	#N/A
		234																						#N/A	#N/A	#N/A	#N/A	#N/A	#N/A
		235																						#N/A	#N/A	#N/A	#N/A	#N/A	#N/A
		236																						#N/A	#N/A	#N/A	#N/A	#N/A	#N/A
		237																						#N/A	#N/A	#N/A	#N/A	#N/A	#N/A
		238																						#N/A	#N/A	#N/A	#N/A	#N/A	#N/A
		239																						#N/A	#N/A	#N/A	#N/A	#N/A	#N/A
		240																						#N/A	#N/A	#N/A	#N/A	#N/A	#N/A
		241																						#N/A	#N/A	#N/A	#N/A	#N/A	#N/A
		242																						#N/A	#N/A	#N/A	#N/A	#N/A	#N/A
		243																						#N/A	#N/A	#N/A	#N/A	#N/A	#N/A
		244																						#N/A	#N/A	#N/A	#N/A	#N/A	#N/A
		245																						#N/A	#N/A	#N/A	#N/A	#N/A	#N/A
		246																						#N/A	#N/A	#N/A	#N/A	#N/A	#N/A
		247																						#N/A	#N/A	#N/A	#N/A	#N/A	#N/A
		248																						#N/A	#N/A	#N/A	#N/A	#N/A	#N/A
		249																						#N/A	#N/A	#N/A	#N/A	#N/A	#N/A
		250																						#N/A	#N/A	#N/A	#N/A	#N/A	#N/A
		251																						#N/A	#N/A	#N/A	#N/A	#N/A	#N/A
		252																						#N/A	#N/A	#N/A	#N/A	#N/A	#N/A
		253																						#N/A	#N/A	#N/A	#N/A	#N/A	#N/A
		254																						#N/A	#N/A	#N/A	#N/A	#N/A	#N/A
		255																						#N/A	#N/A	#N/A	#N/A	#N/A	#N/A
		256																						#N/A	#N/A	#N/A	#N/A	#N/A	#N/A
		257																						#N/A	#N/A	#N/A	#N/A	#N/A	#N/A
		258																						#N/A	#N/A	#N/A	#N/A	#N/A	#N/A
		259																						#N/A	#N/A	#N/A	#N/A	#N/A	#N/A
		260																						#N/A	#N/A	#N/A	#N/A	#N/A	#N/A
		261																						#N/A	#N/A	#N/A	#N/A	#N/A	#N/A
		262																						#N/A	#N/A	#N/A	#N/A	#N/A	#N/A
		263																						#N/A	#N/A	#N/A	#N/A	#N/A	#N/A
		264																						#N/A	#N/A	#N/A	#N/A	#N/A	#N/A
		265																						#N/A	#N/A	#N/A	#N/A	#N/A	#N/A
		266																						#N/A	#N/A	#N/A	#N/A	#N/A	#N/A
		267																						#N/A	#N/A	#N/A	#N/A	#N/A	#N/A
		268																						#N/A	#N/A	#N/A	#N/A	#N/A	#N/A
		269																						#N/A	#N/A	#N/A	#N/A	#N/A	#N/A
		270																						#N/A	#N/A	#N/A	#N/A	#N/A	#N/A
		271																						#N/A	#N/A	#N/A	#N/A	#N/A	#N/A
		272																						#N/A	#N/A	#N/A	#N/A	#N/A	#N/A
		273																						#N/A	#N/A	#N/A	#N/A	#N/A	#N/A
		274																						#N/A	#N/A	#N/A	#N/A	#N/A	#N/A
		275																						#N/A	#N/A	#N/A	#N/A	#N/A	#N/A
		276																						#N/A	#N/A	#N/A	#N/A	#N/A	#N/A
		277																						#N/A	#N/A	#N/A	#N/A	#N/A	#N/A
		278																						#N/A	#N/A	#N/A	#N/A	#N/A	#N/A
		279																						#N/A	#N/A	#N/A	#N/A	#N/A	#N/A
		280																						#N/A	#N/A	#N/A	#N/A	#N/A	#N/A
		281																						#N/A	#N/A	#N/A	#N/A	#N/A	#N/A
		282																						#N/A	#N/A	#N/A	#N/A	#N/A	#N/A
		283																						#N/A	#N/A	#N/A	#N/A	#N/A	#N/A
		284																						#N/A	#N/A	#N/A	#N/A	#N/A	#N/A
		285																						#N/A	#N/A	#N/A	#N/A	#N/A	#N/A
		286																						#N/A	#N/A	#N/A	#N/A	#N/A	#N/A
		287																						#N/A	#N/A	#N/A	#N/A	#N/A	#N/A
		288																						#N/A	#N/A	#N/A	#N/A	#N/A	#N/A
		289																						#N/A	#N/A	#N/A	#N/A	#N/A	#N/A
		290																						#N/A	#N/A	#N/A	#N/A	#N/A	#N/A
		291																						#N/A	#N/A	#N/A	#N/A	#N/A	#N/A
		292																						#N/A	#N/A	#N/A	#N/A	#N/A	#N/A
		293																						#N/A	#N/A	#N/A	#N/A	#N/A	#N/A
		294																						#N/A	#N/A	#N/A	#N/A	#N/A	#N/A
		295																						#N/A	#N/A	#N/A	#N/A	#N/A	#N/A
		296																						#N/A	#N/A	#N/A	#N/A	#N/A	#N/A
		297																						#N/A	#N/A	#N/A	#N/A	#N/A	#N/A
		298																						#N/A	#N/A	#N/A	#N/A	#N/A	#N/A
		299																						#N/A	#N/A	#N/A	#N/A	#N/A	#N/A
		300																						#N/A	#N/A	#N/A	#N/A	#N/A	#N/A
