# Supplementary material for: Why Even More Clinical Research Studies May Be False: Effect of Asymmetrical Handling of Clinically Unexpected Values
Source: PLoS One. 2013 Jun 25;8(6):e65323. doi: 10.1371/journal.pone.0065323 (PMC3692492; doi:10.1371/journal.pone.0065323)
Supplement: File S2 — An Excel spreadsheet compatible with both Microsoft Excel and Libreoffice Calc for calculating the “Tadpole Test” for two groups of data, and generating a dot-plot. (XLS) [file pone.0065323.s002.xls]

## Sheet: Instructions
	A spreadsheet for calculating the "Tadpole Test" for two groups of data, supplementary material to “Why even more clinical research studies may be false: effect of asymmetrical handling of clinically unexpected values”
	Introduction
	This spreadsheet accompanies our publication “Why even more clinical research studies may be false: effect of asymmetrical handling of clinically unexpected values”. In this paper we demonstrate the susceptibility of observational studies to bias though the natural clinical activities of removal, reclassification, and remeasurement of clinically surprising values.
	We demonstrate how this manipulation can be apparent if rather than presenting summary data, dot plots are used, and provide a statistical test - the Tadpole Test, to detect such manipulations.
	We have developed this spreadsheet which can be opened by both Microsoft Excel and Libreoffice to allow researchers to easily calculate the p-value for the Tadpole Test for two groups of data. It detects if the skew of each group is concordant with the direction of the difference in means between the two groups.
	The most recent version of these spreadsheets will be available at http://matthew.shun-shin.com/ekt.html
	Instructions for use
	1) Switch to the sheet labeled “Data” below.
	2) Into the blue boxes delete the sample data by highlighting them and selecting Edit-->Clear-->Contents (in Excel) or Edit-->Delete Content (in Libreoffice).
	3) Enter or copy and paste in your own data for the 2 group, up to 300 data points per group are supported.
	4) The p-value for the Tadpole Test will automatically update on the "Data" worksheet as you enter data. It also shows the z-score which can be used to perform meta-analysis of a group of papers
	5) The dot plot on the right will automatically update once you have pasted in the data.
	Licensed under the GPL
	This program is free software: you can redistribute it and/or modify it under the terms of the GNU General Public License as published by the Free Software Foundation, either version 3 of the License, or (at your option) any later version.
	This spreadsheet is distributed in the hope that it will be useful, but WITHOUT ANY WARRANTY; without even the implied warranty of MERCHANTABILITY or FITNESS FOR A PARTICULAR PURPOSE. See the GNU General Public License for more details.
	You should have received a copy of the GNU General Public License along with this program. If not, see <http://www.gnu.org/licenses/>.
	Copyright Matthew Shun-Shin, Darrel P Francis 2013										Version 1

## Sheet: Data
This sheet calculates the Tadpole Test. If positive (p<0.05) it may suggest un-blinded manipulation of results at the extremes of the data. Please delete the illustrative data and copy and paste in your own. It also plots dot plots for the entered data. You might want to adjust the "number of bins" to obtain an aesthetically pleasing plot, but it has no effect on any of the statistical tests. Aft…
			Group 1	Group 2		Number of bins
						50
	Values	1	0.883083	0.457794
		2	1.37871	1.64632		Differences between Group 1 and Group 2
		3	1.34232	1.3117		Group 1 mean	0.068394
		4	-0.756542	0.175847		Group 1 SD	0.91477
		5	-0.299067	-0.700302		Group 2 mean	-0.0778737
		6	1.00291	0.874068		Group 2 SD	0.866946
		7	0.568093	-0.79098		Difference in means	0.146268
		8	-0.311161	0.552517		Student's T Test	0.282346
		9	0.722076	0.330529		Tadpole Test z-score	-1.26821
		10	-0.594446	-0.817379		Tadpole Test p-value	0.897639
		11	-0.872895	-1.08962
		12	-0.366133	-0.440136
		13	0.508633	-0.183225
		14	-0.126687	1.43758
		15	0.680539	0.115378
		16	0.27778	-0.223263
		17	-0.287983	-0.852946
		18	-0.620241	1.09281
		19	0.227813	0.181231
		20	-0.44328	-0.648069
		21	-1.67452	0.302741
		22	0.668927	-0.928398
		23	-0.0791361	-0.440871
		24	-0.543925	-0.372482
		25	0.00967644	-0.817698
		26	-0.464139	-0.577042
		27	1.1263	1.01409
		28	-0.471038	0.0661055
		29	0.437422	-1.93007
		30	0.422757	-0.720112
		31	-0.0111968	0.349959
		32	1.31791	0.439655
		33	-0.982758	-1.49767
		34	1.21326	0.0459948
		35	-0.12864	-0.664003
		36	0.415322	-0.351878
		37	-1.93184	-0.861052
		38	-1.85817	0.647905
		39	1.66136	-0.709226
		40	0.278338	-0.399671
		41	0.501944	0.146621
		42	0.635408	2.1301
		43	0.312967	-0.0877145
		44	-1.42108	-1.46689
		45	-0.265712	0.651661
		46	0.323512	0.879557
		47	1.38353	0.959206
		48	-1.40562	-0.756954
		49	-2.45087	-0.616447
		50	-1.20578	-0.828731
		51	-1.33535	-1.40258
		52	1.04797	0.42611
		53	-0.599548	0.224879
		54	-1.61081	-0.67457
		55	0.19425	1.31422
		56	0.475929	-0.329389
		57	-0.0277103	-0.993744
		58	0.9933	-1.27101
		59	0.840091	-1.12162
		60	-0.704942	0.309421
		61	0.203298	-1.19559
		62	-0.891523	1.45055
		63	1.61044	0.386777
		64	-0.686792	1.0175
		65	0.915685	1.1839
		66	-0.146159	-1.16856
		67	-0.76636	-0.497768
		68	-0.0383152	-0.367639
		69	0.551038	-0.249
		70	-0.215418	0.636355
		71	0.207447	0.997066
		72	-0.241631	0.555793
		73	0.540246	0.12831
		74	2.28471	-0.0425819
		75	0.770509	-1.19389
		76	-0.21852
		77	-0.552014
		78	1.28837
		79	0.598373
		80	0.316859
		81	-0.557544
		82	1.86252
		83	0.340284
		84	-0.534177
		85	-1.07576
		86	1.01556
		87	0.552586
		88	1.81455
		89	1.12866
		90	-1.41226
		91	0.77628
		92	-0.904194
		93	0.151694
		94	-0.475202
		95	-0.086817
		96	0.282715
		97	0.874979
		98	0.485137
		99	-0.340962
		100	-0.589804
		101
		102
		103
		104
		105
		106
		107
		108
		109
		110
		111
		112
		113
		114
		115
		116
		117
		118
		119
		120
		121
		122
		123
		124
		125
		126
		127
		128
		129
		130
		131
		132
		133
		134
		135
		136
		137
		138
		139
		140
		141
		142
		143
		144
		145
		146
		147
		148
		149
		150
		151
		152
		153
		154
		155
		156
		157
		158
		159
		160
		161
		162
		163
		164
		165
		166
		167
		168
		169
		170
		171
		172
		173
		174
		175
		176
		177
		178
		179
		180
		181
		182
		183
		184
		185
		186
		187
		188
		189
		190
		191
		192
		193
		194
		195
		196
		197
		198
		199
		200
		201
		202
		203
		204
		205
		206
		207
		208
		209
		210
		211
		212
		213
		214
		215
		216
		217
		218
		219
		220
		221
		222
		223
		224
		225
		226
		227
		228
		229
		230
		231
		232
		233
		234
		235
		236
		237
		238
		239
		240
		241
		242
		243
		244
		245
		246
		247
		248
		249
		250
		251
		252
		253
		254
		255
		256
		257
		258
		259
		260
		261
		262
		263
		264
		265
		266
		267
		268
		269
		270
		271
		272
		273
		274
		275
		276
		277
		278
		279
		280
		281
		282
		283
		284
		285
		286
		287
		288
		289
		290
		291
		292
		293
		294
		295
		296
		297
		298
		299
		300

## Sheet: DP_Calc
This sheet performs the calculations for generating dot plots. If you are just using this workbook to analyse your own data you should not need to modify this sheet.
			Raw Y			Binned Y			Binned X			Binned X + Disp			Number of Bins
			Group 1	Group 2		Group 1	Group 2		Group 1	Group 2		Group 1	Group 2		50
	Values	1	0.883083	0.457794		0.852405	0.473558		-0.1	-0.05		0.848485	1.92424
		2	1.37871	1.64632		1.42067	1.6101		-0.05	0		0.924242	2		Bin Step
		3	1.34232	1.3117		1.32596	1.32596		-0.1	-0.05		0.848485	1.92424		0.0947117
		4	-0.756542	0.175847		-0.757693	0.189423		-0.05	-0.15		0.924242	1.77273
		5	-0.299067	-0.700302		-0.284135	-0.662982		-0.2	-0.25		0.69697	1.62121		Max X Displacement
		6	1.00291	0.874068		1.04183	0.852405		-0.1	-0.05		0.848485	1.92424		0.3
		7	0.568093	-0.79098		0.56827	-0.757693		-0.2	-0.1		0.69697	1.84848
		8	-0.311161	0.552517		-0.284135	0.56827		-0.1	-0.05		0.848485	1.92424
		9	0.722076	0.330529		0.757693	0.284135		-0.1	-0.1		0.848485	1.84848
		10	-0.594446	-0.817379		-0.56827	-0.852405		-0.3	-0.2		0.545455	1.69697
		11	-0.872895	-1.08962		-0.852405	-1.13654		-0.05	-0.1		0.924242	1.84848
		12	-0.366133	-0.440136		-0.378847	-0.473558		-0.05	-0.1		0.924242	1.84848
		13	0.508633	-0.183225		0.473558	-0.189423		-0.2	-0.05		0.69697	1.92424
		14	-0.126687	1.43758		-0.0947117	1.42067		-0.15	-0.05		0.772727	1.92424
		15	0.680539	0.115378		0.662982	0.0947117		-0.1	-0.1		0.848485	1.84848
		16	0.27778	-0.223263		0.284135	-0.189423		-0.25	0.05		0.621212	2.07576
		17	-0.287983	-0.852946		-0.284135	-0.852405		0	-0.1		1	1.84848
		18	-0.620241	1.09281		-0.662982	1.13654		-0.1	0		0.848485	2
		19	0.227813	0.181231		0.189423	0.189423		-0.2	-0.05		0.69697	1.92424
		20	-0.44328	-0.648069		-0.473558	-0.662982		-0.15	-0.15		0.772727	1.77273
		21	-1.67452	0.302741		-1.70481	0.284135		0	0		1	2
		22	0.668927	-0.928398		0.662982	-0.947117		0	-0.05		1	1.92424
		23	-0.0791361	-0.440871		-0.0947117	-0.473558		-0.05	0		0.924242	2
		24	-0.543925	-0.372482		-0.56827	-0.378847		-0.2	-0.15		0.69697	1.77273
		25	0.00967644	-0.817698		0	-0.852405		-0.15	0		0.772727	2
		26	-0.464139	-0.577042		-0.473558	-0.56827		-0.05	0		0.924242	2
		27	1.1263	1.01409		1.13654	1.04183		-0.05	-0.1		0.924242	1.84848
		28	-0.471038	0.0661055		-0.473558	0.0947117		0.05	0		1.07576	2
		29	0.437422	-1.93007		0.473558	-1.89423		-0.1	0		0.848485	2
		30	0.422757	-0.720112		0.378847	-0.757693		-0.1	0		0.848485	2
		31	-0.0111968	0.349959		0	0.378847		-0.05	-0.1		0.924242	1.84848
		32	1.31791	0.439655		1.32596	0.473558		0	0.05		1	2.07576
		33	-0.982758	-1.49767		-0.947117	-1.51539		-0.05	0		0.924242	2
		34	1.21326	0.0459948		1.23125	0		0	-0.05		1	1.92424
		35	-0.12864	-0.664003		-0.0947117	-0.662982		0.05	-0.05		1.07576	1.92424
		36	0.415322	-0.351878		0.378847	-0.378847		0	-0.05		1	1.92424
		37	-1.93184	-0.861052		-1.89423	-0.852405		-0.05	0.1		0.924242	2.15152
		38	-1.85817	0.647905		-1.89423	0.662982		0.05	-0.1		1.07576	1.84848
		39	1.66136	-0.709226		1.70481	-0.662982		0	0.05		1	2.07576
		40	0.278338	-0.399671		0.284135	-0.378847		-0.15	0.05		0.772727	2.07576
		41	0.501944	0.146621		0.473558	0.189423		0	0.05		1	2.07576
		42	0.635408	2.1301		0.662982	2.08366		0.1	0		1.15152	2
		43	0.312967	-0.0877145		0.284135	-0.0947117		-0.05	0		0.924242	2
		44	-1.42108	-1.46689		-1.42067	-1.42067		-0.1	-0.05		0.848485	1.92424
		45	-0.265712	0.651661		-0.284135	0.662982		0.1	0		1.15152	2
		46	0.323512	0.879557		0.284135	0.852405		0.05	0.05		1.07576	2.07576
		47	1.38353	0.959206		1.42067	0.947117		0.05	0		1.07576	2
		48	-1.40562	-0.756954		-1.42067	-0.757693		0	0.1		1	2.15152
		49	-2.45087	-0.616447		-2.4625	-0.662982		0	0.15		1	2.22727
		50	-1.20578	-0.828731		-1.23125	-0.852405		0	0.2		1	2.30303
		51	-1.33535	-1.40258		-1.32596	-1.42067		0	0.05		1	2.07576
		52	1.04797	0.42611		1.04183	0.378847		0	0		1	2
		53	-0.599548	0.224879		-0.56827	0.189423		-0.1	0.15		0.848485	2.22727
		54	-1.61081	-0.67457		-1.6101	-0.662982		0	0.25		1	2.37879
		55	0.19425	1.31422		0.189423	1.32596		-0.1	0.05		0.848485	2.07576
		56	0.475929	-0.329389		0.473558	-0.284135		0.1	-0.05		1.15152	1.92424
		57	-0.0277103	-0.993744		0	-0.947117		0.05	0.05		1.07576	2.07576
		58	0.9933	-1.27101		0.947117	-1.23125		-0.05	-0.1		0.924242	1.84848
		59	0.840091	-1.12162		0.852405	-1.13654		0	0		1	2
		60	-0.704942	0.309421		-0.662982	0.284135		0	0.1		1	2.15152
		61	0.203298	-1.19559		0.189423	-1.23125		0	0		1	2
		62	-0.891523	1.45055		-0.852405	1.42067		0.05	0.05		1.07576	2.07576
		63	1.61044	0.386777		1.6101	0.378847		0	0.1		1	2.15152
		64	-0.686792	1.0175		-0.662982	1.04183		0.1	0		1.15152	2
		65	0.915685	1.1839		0.947117	1.23125		0.05	0		1.07576	2
		66	-0.146159	-1.16856		-0.189423	-1.13654		-0.1	0.1		0.848485	2.15152
		67	-0.76636	-0.497768		-0.757693	-0.473558		0.05	0.1		1.07576	2.15152
		68	-0.0383152	-0.367639		0	-0.378847		0.15	0.15		1.22727	2.22727
		69	0.551038	-0.249		0.56827	-0.284135		-0.1	0.05		0.848485	2.07576
		70	-0.215418	0.636355		-0.189423	0.662982		0	0.1		1	2.15152
		71	0.207447	0.997066		0.189423	1.04183		0.1	0.1		1.15152	2.15152
		72	-0.241631	0.555793		-0.284135	0.56827		0.2	0.05		1.30303	2.07576
		73	0.540246	0.12831		0.56827	0.0947117		0	0.1		1	2.15152
		74	2.28471	-0.0425819		2.27308	0		0	0.05		1	2.07576
		75	0.770509	-1.19389		0.757693	-1.23125		0	0.1		1	2.15152
		76	-0.21852			-0.189423			0.1			1.15152	#N/A
		77	-0.552014			-0.56827			0			1	#N/A
		78	1.28837			1.32596			0.1			1.15152	#N/A
		79	0.598373			0.56827			0.1			1.15152	#N/A
		80	0.316859			0.284135			0.15			1.22727	#N/A
		81	-0.557544			-0.56827			0.1			1.15152	#N/A
		82	1.86252			1.89423			0			1	#N/A
		83	0.340284			0.378847			0.1			1.15152	#N/A
		84	-0.534177			-0.56827			0.2			1.30303	#N/A
		85	-1.07576			-1.04183			0			1	#N/A
		86	1.01556			1.04183			0.1			1.15152	#N/A
		87	0.552586			0.56827			0.2			1.30303	#N/A
		88	1.81455			1.79952			0			1	#N/A
		89	1.12866			1.13654			0.05			1.07576	#N/A
		90	-1.41226			-1.42067			0.1			1.15152	#N/A
		91	0.77628			0.757693			0.1			1.15152	#N/A
		92	-0.904194			-0.947117			0.05			1.07576	#N/A
		93	0.151694			0.189423			0.2			1.30303	#N/A
		94	-0.475202			-0.473558			0.15			1.22727	#N/A
		95	-0.086817			-0.0947117			0.15			1.22727	#N/A
		96	0.282715			0.284135			0.25			1.37879	#N/A
		97	0.874979			0.852405			0.1			1.15152	#N/A
		98	0.485137			0.473558			0.2			1.30303	#N/A
		99	-0.340962			-0.378847			0.05			1.07576	#N/A
		100	-0.589804			-0.56827			0.3			1.45455	#N/A
		101										#N/A	#N/A
		102										#N/A	#N/A
		103										#N/A	#N/A
		104										#N/A	#N/A
		105										#N/A	#N/A
		106										#N/A	#N/A
		107										#N/A	#N/A
		108										#N/A	#N/A
		109										#N/A	#N/A
		110										#N/A	#N/A
		111										#N/A	#N/A
		112										#N/A	#N/A
		113										#N/A	#N/A
		114										#N/A	#N/A
		115										#N/A	#N/A
		116										#N/A	#N/A
		117										#N/A	#N/A
		118										#N/A	#N/A
		119										#N/A	#N/A
		120										#N/A	#N/A
		121										#N/A	#N/A
		122										#N/A	#N/A
		123										#N/A	#N/A
		124										#N/A	#N/A
		125										#N/A	#N/A
		126										#N/A	#N/A
		127										#N/A	#N/A
		128										#N/A	#N/A
		129										#N/A	#N/A
		130										#N/A	#N/A
		131										#N/A	#N/A
		132										#N/A	#N/A
		133										#N/A	#N/A
		134										#N/A	#N/A
		135										#N/A	#N/A
		136										#N/A	#N/A
		137										#N/A	#N/A
		138										#N/A	#N/A
		139										#N/A	#N/A
		140										#N/A	#N/A
		141										#N/A	#N/A
		142										#N/A	#N/A
		143										#N/A	#N/A
		144										#N/A	#N/A
		145										#N/A	#N/A
		146										#N/A	#N/A
		147										#N/A	#N/A
		148										#N/A	#N/A
		149										#N/A	#N/A
		150										#N/A	#N/A
		151										#N/A	#N/A
		152										#N/A	#N/A
		153										#N/A	#N/A
		154										#N/A	#N/A
		155										#N/A	#N/A
		156										#N/A	#N/A
		157										#N/A	#N/A
		158										#N/A	#N/A
		159										#N/A	#N/A
		160										#N/A	#N/A
		161										#N/A	#N/A
		162										#N/A	#N/A
		163										#N/A	#N/A
		164										#N/A	#N/A
		165										#N/A	#N/A
		166										#N/A	#N/A
		167										#N/A	#N/A
		168										#N/A	#N/A
		169										#N/A	#N/A
		170										#N/A	#N/A
		171										#N/A	#N/A
		172										#N/A	#N/A
		173										#N/A	#N/A
		174										#N/A	#N/A
		175										#N/A	#N/A
		176										#N/A	#N/A
		177										#N/A	#N/A
		178										#N/A	#N/A
		179										#N/A	#N/A
		180										#N/A	#N/A
		181										#N/A	#N/A
		182										#N/A	#N/A
		183										#N/A	#N/A
		184										#N/A	#N/A
		185										#N/A	#N/A
		186										#N/A	#N/A
		187										#N/A	#N/A
		188										#N/A	#N/A
		189										#N/A	#N/A
		190										#N/A	#N/A
		191										#N/A	#N/A
		192										#N/A	#N/A
		193										#N/A	#N/A
		194										#N/A	#N/A
		195										#N/A	#N/A
		196										#N/A	#N/A
		197										#N/A	#N/A
		198										#N/A	#N/A
		199										#N/A	#N/A
		200										#N/A	#N/A
		201										#N/A	#N/A
		202										#N/A	#N/A
		203										#N/A	#N/A
		204										#N/A	#N/A
		205										#N/A	#N/A
		206										#N/A	#N/A
		207										#N/A	#N/A
		208										#N/A	#N/A
		209										#N/A	#N/A
		210										#N/A	#N/A
		211										#N/A	#N/A
		212										#N/A	#N/A
		213										#N/A	#N/A
		214										#N/A	#N/A
		215										#N/A	#N/A
		216										#N/A	#N/A
		217										#N/A	#N/A
		218										#N/A	#N/A
		219										#N/A	#N/A
		220										#N/A	#N/A
		221										#N/A	#N/A
		222										#N/A	#N/A
		223										#N/A	#N/A
		224										#N/A	#N/A
		225										#N/A	#N/A
		226										#N/A	#N/A
		227										#N/A	#N/A
		228										#N/A	#N/A
		229										#N/A	#N/A
		230										#N/A	#N/A
		231										#N/A	#N/A
		232										#N/A	#N/A
		233										#N/A	#N/A
		234										#N/A	#N/A
		235										#N/A	#N/A
		236										#N/A	#N/A
		237										#N/A	#N/A
		238										#N/A	#N/A
		239										#N/A	#N/A
		240										#N/A	#N/A
		241										#N/A	#N/A
		242										#N/A	#N/A
		243										#N/A	#N/A
		244										#N/A	#N/A
		245										#N/A	#N/A
		246										#N/A	#N/A
		247										#N/A	#N/A
		248										#N/A	#N/A
		249										#N/A	#N/A
		250										#N/A	#N/A
		251										#N/A	#N/A
		252										#N/A	#N/A
		253										#N/A	#N/A
		254										#N/A	#N/A
		255										#N/A	#N/A
		256										#N/A	#N/A
		257										#N/A	#N/A
		258										#N/A	#N/A
		259										#N/A	#N/A
		260										#N/A	#N/A
		261										#N/A	#N/A
		262										#N/A	#N/A
		263										#N/A	#N/A
		264										#N/A	#N/A
		265										#N/A	#N/A
		266										#N/A	#N/A
		267										#N/A	#N/A
		268										#N/A	#N/A
		269										#N/A	#N/A
		270										#N/A	#N/A
		271										#N/A	#N/A
		272										#N/A	#N/A
		273										#N/A	#N/A
		274										#N/A	#N/A
		275										#N/A	#N/A
		276										#N/A	#N/A
		277										#N/A	#N/A
		278										#N/A	#N/A
		279										#N/A	#N/A
		280										#N/A	#N/A
		281										#N/A	#N/A
		282										#N/A	#N/A
		283										#N/A	#N/A
		284										#N/A	#N/A
		285										#N/A	#N/A
		286										#N/A	#N/A
		287										#N/A	#N/A
		288										#N/A	#N/A
		289										#N/A	#N/A
		290										#N/A	#N/A
		291										#N/A	#N/A
		292										#N/A	#N/A
		293										#N/A	#N/A
		294										#N/A	#N/A
		295										#N/A	#N/A
		296										#N/A	#N/A
		297										#N/A	#N/A
		298										#N/A	#N/A
		299										#N/A	#N/A
		300										#N/A	#N/A

## Sheet: TP_Calc
This sheet performs the calculations behind the Tadpole Test. If you are just using the workbook to analyse your own data you should not need to modify this sheet.
			Raw Y			Raw-Mean			Squared			Cubed
			Group 1	Group 2		Group1	Group 2		Group1	Group 2		Group 1	Group 2			Group 1	Group 2
	Values	1	0.883083	0.457794		0.814689	0.535668		0.663719	0.28694		0.540725	0.153705		n	100	75
		2	1.37871	1.64632		1.31032	1.72419		1.71694	2.97283		2.24973	5.12572		m	0.068394	-0.0778737
		3	1.34232	1.3117		1.27393	1.38958		1.6229	1.93093		2.06746	2.68317		m2	0.828436	0.741574
		4	-0.756542	0.175847		-0.824936	0.253721		0.68052	0.0643743		-0.561385	0.0163331		m3	-0.14055	0.170844
		5	-0.299067	-0.700302		-0.367461	-0.622428		0.135028	0.387417		-0.0496174	-0.241139
		6	1.00291	0.874068		0.93452	0.951942		0.873327	0.906193		0.816141	0.862643		g1	-0.186398	0.267527
		7	0.568093	-0.79098		0.499699	-0.713106		0.249699	0.508521		0.124774	-0.362629
		8	-0.311161	0.552517		-0.379555	0.63039		0.144062	0.397392		-0.0546795	0.250512		g1_var	0.0576757	0.0759109
		9	0.722076	0.330529		0.653682	0.408403		0.4273	0.166793		0.279319	0.0681187		g1_kurt	0.284411	0.351141
		10	-0.594446	-0.817379		-0.66284	-0.739505		0.439357	0.546868		-0.291223	-0.404412
		11	-0.872895	-1.08962		-0.941289	-1.01175		0.886025	1.02363		-0.834005	-1.03566		w2	1.13748	1.16847
		12	-0.366133	-0.440136		-0.434527	-0.362262		0.188814	0.131234		-0.0820445	-0.0475411		delta	3.94031	3.58403
		13	0.508633	-0.183225		0.440239	-0.105352		0.193811	0.0110989		0.0853231	-0.00116929		a2	14.5475	11.8712
		14	-0.126687	1.43758		-0.195081	1.51546		0.0380565	2.29661		-0.00742408	3.48041
		15	0.680539	0.115378		0.612145	0.193252		0.374721	0.0373463		0.229384	0.00721724		z	-0.796396	0.997128
		16	0.27778	-0.223263		0.209386	-0.145389		0.0438426	0.021138		0.00918004	-0.00307324
		17	-0.287983	-0.852946		-0.356377	-0.775072		0.127005	0.600737		-0.0452615	-0.465615		Tadpole Test Z Score	-1.26821
		18	-0.620241	1.09281		-0.688635	1.17068		0.474218	1.3705		-0.326563	1.60442		Tadpole Test Statistic	0.897639
		19	0.227813	0.181231		0.159419	0.259105		0.0254146	0.0671354		0.00405158	0.0173951
		20	-0.44328	-0.648069		-0.511674	-0.570196		0.26181	0.325123		-0.133961	-0.185384
		21	-1.67452	0.302741		-1.74291	0.380615		3.03774	0.144868		-5.29452	0.0551388
		22	0.668927	-0.928398		0.600533	-0.850525		0.36064	0.723392		0.216576	-0.615263
		23	-0.0791361	-0.440871		-0.14753	-0.362998		0.0217651	0.131767		-0.00321102	-0.0478312
		24	-0.543925	-0.372482		-0.612319	-0.294608		0.374934	0.0867939		-0.229579	-0.0255702
		25	0.00967644	-0.817698		-0.0587176	-0.739824		0.00344775	0.54734		-0.000202444	-0.404936
		26	-0.464139	-0.577042		-0.532533	-0.499169		0.283592	0.249169		-0.151022	-0.124378
		27	1.1263	1.01409		1.05791	1.09197		1.11916	1.19239		1.18397	1.30205
		28	-0.471038	0.0661055		-0.539432	0.143979		0.290987	0.02073		-0.156967	0.00298469
		29	0.437422	-1.93007		0.369028	-1.8522		0.136181	3.43064		0.0502547	-6.35422
		30	0.422757	-0.720112		0.354363	-0.642238		0.125573	0.41247		0.0444984	-0.264904
		31	-0.0111968	0.349959		-0.0795908	0.427833		0.0063347	0.183041		-0.000504184	0.078311
		32	1.31791	0.439655		1.24952	0.517529		1.5613	0.267836		1.95087	0.138613
		33	-0.982758	-1.49767		-1.05115	-1.41979		1.10492	2.01581		-1.16144	-2.86203
		34	1.21326	0.0459948		1.14486	0.123868		1.31071	0.0153434		1.50059	0.00190056
		35	-0.12864	-0.664003		-0.197034	-0.586129		0.0388223	0.343547		-0.0076493	-0.201363
		36	0.415322	-0.351878		0.346928	-0.274004		0.120359	0.0750782		0.041756	-0.0205717
		37	-1.93184	-0.861052		-2.00024	-0.783179		4.00095	0.613369		-8.00285	-0.480377
		38	-1.85817	0.647905		-1.92656	0.725779		3.71163	0.526755		-7.15068	0.382307
		39	1.66136	-0.709226		1.59296	-0.631352		2.53754	0.398605		4.0422	-0.25166
		40	0.278338	-0.399671		0.209944	-0.321798		0.0440763	0.103554		0.00925354	-0.0333233
		41	0.501944	0.146621		0.43355	0.224495		0.187966	0.050398		0.0814927	0.0113141
		42	0.635408	2.1301		0.567014	2.20797		0.321505	4.87514		0.182298	10.7642
		43	0.312967	-0.0877145		0.244573	-0.00984079		0.0598162	9.68412e-05		0.0146294	-9.52994e-07
		44	-1.42108	-1.46689		-1.48947	-1.38902		2.21852	1.92938		-3.30442	-2.67995
		45	-0.265712	0.651661		-0.334106	0.729535		0.111627	0.532222		-0.037295	0.388274
		46	0.323512	0.879557		0.255118	0.95743		0.0650854	0.916673		0.0166045	0.87765
		47	1.38353	0.959206		1.31513	1.03708		1.72957	1.07553		2.27461	1.11541
		48	-1.40562	-0.756954		-1.47401	-0.67908		2.17271	0.46115		-3.20261	-0.313157
		49	-2.45087	-0.616447		-2.51927	-0.538573		6.34671	0.290061		-15.9891	-0.156219
		50	-1.20578	-0.828731		-1.27417	-0.750857		1.62352	0.563786		-2.06864	-0.423323
		51	-1.33535	-1.40258		-1.40375	-1.32471		1.9705	1.75486		-2.76609	-2.32468
		52	1.04797	0.42611		0.979578	0.503984		0.959572	0.254		0.939975	0.128012
		53	-0.599548	0.224879		-0.667942	0.302753		0.446147	0.0916591		-0.298	0.02775
		54	-1.61081	-0.67457		-1.67921	-0.596696		2.81974	0.356047		-4.73492	-0.212452
		55	0.19425	1.31422		0.125856	1.3921		0.0158398	1.93794		0.00199354	2.6978
		56	0.475929	-0.329389		0.407535	-0.251515		0.166085	0.0632599		0.0676853	-0.0159108
		57	-0.0277103	-0.993744		-0.0961043	-0.91587		0.00923604	0.838819		-0.000887623	-0.768249
		58	0.9933	-1.27101		0.924906	-1.19313		0.855451	1.42356		0.791212	-1.6985
		59	0.840091	-1.12162		0.771697	-1.04375		0.595516	1.08942		0.459558	-1.13708
		60	-0.704942	0.309421		-0.773336	0.387295		0.598048	0.149997		-0.462492	0.0580932
		61	0.203298	-1.19559		0.134904	-1.11772		0.018199	1.2493		0.00245512	-1.39636
		62	-0.891523	1.45055		-0.959917	1.52842		0.921441	2.33607		-0.884507	3.5705
		63	1.61044	0.386777		1.54205	0.464651		2.37791	0.2159		3.66684	0.100318
		64	-0.686792	1.0175		-0.755187	1.09537		0.570307	1.19984		-0.430688	1.31428
		65	0.915685	1.1839		0.847291	1.26177		0.717902	1.59207		0.608272	2.00884
		66	-0.146159	-1.16856		-0.214553	-1.09069		0.046033	1.18961		-0.00987652	-1.29749
		67	-0.76636	-0.497768		-0.834754	-0.419894		0.696815	0.176311		-0.581669	-0.0740318
		68	-0.0383152	-0.367639		-0.106709	-0.289766		0.0113869	0.0839641		-0.00121508	-0.0243299
		69	0.551038	-0.249		0.482644	-0.171126		0.232946	0.0292841		0.11243	-0.00501127
		70	-0.215418	0.636355		-0.283812	0.714229		0.0805493	0.510123		-0.0228609	0.364345
		71	0.207447	0.997066		0.139053	1.07494		0.0193358	1.15549		0.0026887	1.24209
		72	-0.241631	0.555793		-0.310026	0.633667		0.0961158	0.401534		-0.0297984	0.254439
		73	0.540246	0.12831		0.471852	0.206183		0.222645	0.0425115		0.105055	0.00876516
		74	2.28471	-0.0425819		2.21631	0.0352918		4.91205	0.00124551		10.8867	4.39563e-05
		75	0.770509	-1.19389		0.702115	-1.11602		0.492965	1.2455		0.346118	-1.39
		76	-0.21852			-0.286914			0.0823196			-0.0236186
		77	-0.552014			-0.620408			0.384906			-0.238799
		78	1.28837			1.21997			1.48834			1.81573
		79	0.598373			0.529979			0.280878			0.148859
		80	0.316859			0.248465			0.061735			0.015339
		81	-0.557544			-0.625938			0.391799			-0.245242
		82	1.86252			1.79413			3.21889			5.7751
		83	0.340284			0.27189			0.0739242			0.0200992
		84	-0.534177			-0.602571			0.363092			-0.218789
		85	-1.07576			-1.14416			1.3091			-1.49781
		86	1.01556			0.947163			0.897118			0.849718
		87	0.552586			0.484192			0.234442			0.113515
		88	1.81455			1.74615			3.04905			5.3241
		89	1.12866			1.06027			1.12417			1.19192
		90	-1.41226			-1.48065			2.19232			-3.24606
		91	0.77628			0.707885			0.501102			0.354723
		92	-0.904194			-0.972588			0.945927			-0.919996
		93	0.151694			0.0833004			0.00693896			0.000578018
		94	-0.475202			-0.543596			0.295496			-0.160631
		95	-0.086817			-0.155211			0.0240904			-0.0037391
		96	0.282715			0.214321			0.0459335			0.00984451
		97	0.874979			0.806585			0.65058			0.524748
		98	0.485137			0.416743			0.173675			0.0723779
		99	-0.340962			-0.409356			0.167572			-0.0685968
		100	-0.589804			-0.658198			0.433224			-0.285147
		101
		102
		103
		104
		105
		106
		107
		108
		109
		110
		111
		112
		113
		114
		115
		116
		117
		118
		119
		120
		121
		122
		123
		124
		125
		126
		127
		128
		129
		130
		131
		132
		133
		134
		135
		136
		137
		138
		139
		140
		141
		142
		143
		144
		145
		146
		147
		148
		149
		150
		151
		152
		153
		154
		155
		156
		157
		158
		159
		160
		161
		162
		163
		164
		165
		166
		167
		168
		169
		170
		171
		172
		173
		174
		175
		176
		177
		178
		179
		180
		181
		182
		183
		184
		185
		186
		187
		188
		189
		190
		191
		192
		193
		194
		195
		196
		197
		198
		199
		200
		201
		202
		203
		204
		205
		206
		207
		208
		209
		210
		211
		212
		213
		214
		215
		216
		217
		218
		219
		220
		221
		222
		223
		224
		225
		226
		227
		228
		229
		230
		231
		232
		233
		234
		235
		236
		237
		238
		239
		240
		241
		242
		243
		244
		245
		246
		247
		248
		249
		250
		251
		252
		253
		254
		255
		256
		257
		258
		259
		260
		261
		262
		263
		264
		265
		266
		267
		268
		269
		270
		271
		272
		273
		274
		275
		276
		277
		278
		279
		280
		281
		282
		283
		284
		285
		286
		287
		288
		289
		290
		291
		292
		293
		294
		295
		296
		297
		298
		299
		300
